# Supplementary material
Source: publisher figshare collection journal article supplement (https://tandf.figshare.com/ndownloader/files/23613018)
Supplement: Supplementary file 1 [file 23613018]

**SUPPLEMENTARY MATERIAL**

**Traphanoside GO1, a new triterpenoid saponin from the aerial parts of *Glinus oppositifolius* with the inhibitory effect on PGE2 production in LPS-induced HepG2 cells**

Do Thi Haa,*, Nguyen Thi Thua, Tran Thanh Haa, Vu Huong Thuyb,Nguyen Huy Vanb and Tran Quang Lucb , Nguyen Thi Vinh Hueb

*aDepartment of Phytochemistry, National Institute of Medical Materials, Hanoi, 111000, Vietnam*

***b****Traphaco Join Stock Company*

*To whom correspondences should be addressed: E-mails: hado.nimms@gmail.com

**Abstract**

A new saponin, 3-*O*-[*α*-ʟ-rhamnosyl-(1→3)*-β*-ᴅ-glucopyranosyl]-28-*O*-*β*-ᴅ-glucopyranosyl serjanic acid (Traphanoside GO1, **11**) along with eleven compounds (**1-10** and **12**) were isolated from the aerial parts of *Glinus oppositifolius*. The structures of all isolates were elucidated by analyzing extensive 1D- and 2D-NMR and HR-ESI-MS, comparing with reported literature data. Compounds **7-8**, **10-11**,and 90% ethanol extract (**GOE90**) were evaluated for the inhibitory effect on PGE2 production from activated HepG2 cells. Among these, new compound **11** showed the most potent inhibitory activity by suppressing LPS-induced PGE2 productionon the HepG2 cells.

**Keywords:** *Glinus oppositifolius*, Molliginaceae, Traphanoside GO1,3-*O*-[*α*-ʟ-rhamnosyl-(1→3)*-β*-ᴅ-glucopyranosyl]-28-*O*-*β*-ᴅ-glucopyranosyl serjanic acid, PGE2, HepG2 cell

**CONTENTS**

**Pages**

[General experimental produces S3](#_Toc34840869)

[Acid hydrolysis and sugar identification S3](#_Toc34840870)

[Cell culture S4](#_Toc34840871)

[Cell viability assay S4](#_Toc34840872)

[**Figure S1.** 1H-NMR spectrum (CD3OD, 500 MHz) of compound **11** S5](#_Toc41636963)

[**Figure S2.** 13C-NMR spectrum (CD3OD, 125 MHz) of compound **11** S5](#_Toc41636964)

[**Figure S3.** DEPT spectrum of compound **11** S6](#_Toc41636965)

[**Figure S4.** 1H-1H COSY spectrum (CD3OD, 500/500 MHz) of compound **11** S6](#_Toc41636966)

[**Figure S5.** HSQC spectrum (CD3OD, 500/125 MHz) of compound **11** S7](#_Toc41636967)

[**Figure S6.** HMBC spectrum (CD3OD, 500/125 MHz) of compound **11** S7](#_Toc41636968)

[**Figure S7.** NOESY spectrum (CD3OD, 500/125 MHz) of compound **11** S8](#_Toc41636969)

[**Figure S8.** HR-ESI-MS spectrum of compound **11** S8](#_Toc41636970)

[**Figure S9.** Key 1H-1H COSY (▬) and HMBC (→) correlations of compound **11** S9](#_Toc41636971)

[**Figure S10.** Effect of **GOE90** and compounds **7**, **8**, **10**, **11** on PGE2 production S9](#_Toc41636972)

[**Figure S11.** HPLC chromatograms for sugar analysis S10](#_Toc41636973)

[**Table S1.** The NMR spectra data for compound **11** S11](#_Toc40692816)

# General experimental produces

NMR spectra were recorded on a Bruker Advance Digital 500 MHz NMR spectrometer (Karlsruhe, Germany) with TMS as the internal standard, *J* in Hz at 294 K. HR-ESI-MS data were analyzed *via* an Agilent 6530 Q-TOF (Agilent Technologies, Inc., Santa Clara, CA, USA) spectrometer. HPLC a Kinetex C18 column (250 × 20.0 mm, 5 µm; Phenomenex, Torrance, CA). Silica gel (Merck, 63-200 mm particle size) was used for column chromatography. TLC was carried out with silica gel 60F254 and RP-18F254 plates. HepG2 cells were purchased from the American Type Culture Collection (ATCC, Rockville, MD). Dulbecco’s modified Eagle’s medium (DMEM), trypsin, and fetal bovine serum (FBS) were purchased from Gibco BRL (Grand Island, NY). Secondary mouse or rabbit HRP-conjugated antibodies (1:5000 or 1:10,000, Cell Signaling, #7074, #7076). LPS (Cat: L4391), and MTT (cat: M2128) were purchased from Sigma-Aldrich, L-glutamine (Invitrogen, CA, USA), Penicillin and streptomycin were obtained from Biochrom.

# Acid hydrolysis and sugar identification

Compound **11** (5.0 mg) was dissolved in 1 mL of 1.0 N HCl (Dioxane-H2O, 1:1, v/v) for 5 h in a water bath maintained at 80°C. After cooling, the solution was evaporated under vacuum in a water bath at 60°C and the residue was separated by solvent-solvent partition using CH2Cl2 and water. The sugar components in the aqueous layer were analyzed by silica gel TLC and compared with standard sugars. The solvent system was CH2Cl2-MeOH-H2O (2:1:0.2, v/v/v) and spots were visualized by spraying with 95% EtOH-H2SO4-anisaldehyde (9:0.5:0.5, v/v/v), then heated at 200°C for 7 min. The *R*f values of glucose and rhamnose detected by TLC were 0.30 and 0.75, respectively. The water residue was dissolved in 3 mL of pyridine and heated with 10 mg of l-cysteine methyl ester hydrochloride. After heating at 80°C for 60 min, 0.1 mL of *o*-tolylisothiocyanate was reacted with the mixture at 80°C for 60 min. The reaction mixture evaporated under a vacuum. The reaction mixtures were directly analyzed by HPLC (Phenomenex column 250×4.6 mm, 5 µm), with a mobile phase MeCN-H2O (35:65, v/v); flow rate of 0.5 min/mL; UV detection at 250 nm ([Tanaka et al. 2007](#_ENREF_2)). Peaks at *t*R (min) 15.1 and 27.7 for ᴅ-glucose and ʟ-rhamnose, respectively. The retention times were compared to the standards with co-condition HPLC, and the absolute configurations of sugars from the hydrolysis experiment were established.

# Cell culture

Human HepG2 cells were maintained in DMEM supplemented with 10% fetal bovine serum, 100 units/mL penicillin, 100 μg/mL streptomycin, 2 mM ʟ-glutamine, and kept at 37°C in a humidified atmosphere of 5% CO2 in the air. Cells were grown to 70% confluence and then preincubated in a serum-free medium for 24 hours before treatment as previously described ([Zang et al. 2004](#_ENREF_3)).

# Cell viability assay

Cells were seeded into 96-well plates at a density of 2 x 103 cells/well and cultured for 24 hr. After incubation of the cells with **GOE90** extract and compounds **7**, **8**, **10**, and **11** at different concentrations for 48 hr, the cytotoxicity of the isolated compounds was determined by the MTT assay as previously described ([Mosmann 1983](#_ENREF_1)). Percent cell viability was calculated based on the absorbance measured relative to the absorbance of control cells exposed to the vehicle alone.

Figure S1. 1H-NMR spectrum (CD3OD, 500 MHz) of compound 11

**Figure S2.** 13C-NMR spectrum (CD3OD, 125 MHz) of compound **11**

**Figure S3.** DEPT spectrum of compound **11**

**Figure S4.** 1H-1H COSY spectrum (CD3OD, 500/500 MHz) of compound **11**

**Figure S5.** HSQC spectrum (CD3OD, 500/125 MHz) of compound **11**

**Figure S6.** HMBC spectrum (CD3OD, 500/125 MHz) of compound **11**

**Figure S7.** NOESY spectrum (CD3OD, 500/125 MHz) of compound **11**

**
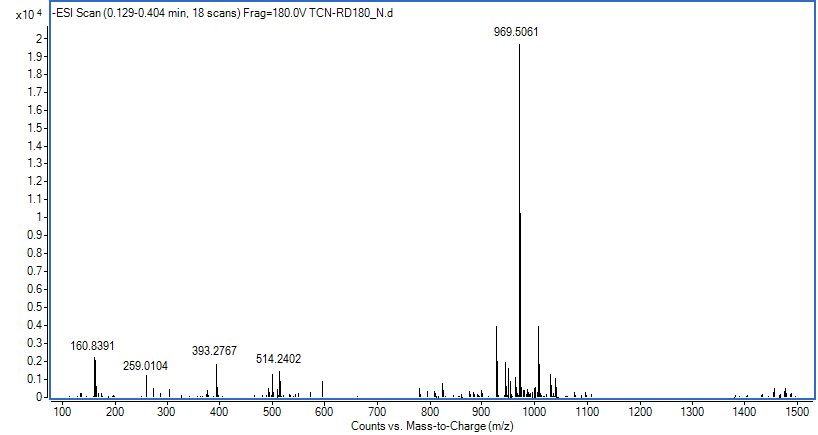
**

**Figure S8.** HR-ESI-MS spectrum of compound **11**


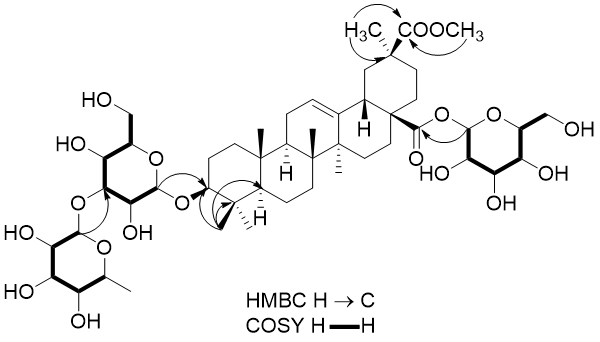


**Figure S9.** Key 1H-1H COSY (▬) and HMBC (→) correlations of compound **11**

**
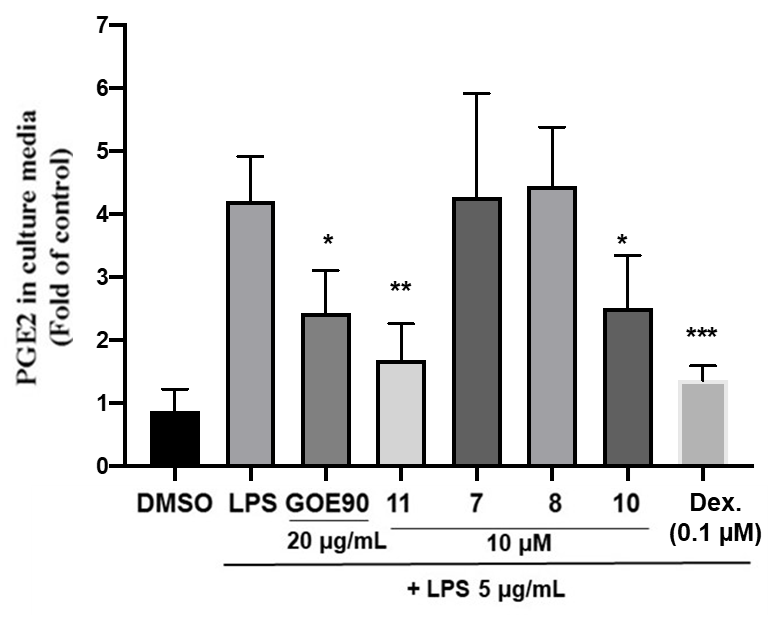
**

**Figure S10.** Effect of **GOE90** and compounds **7**, **8**, **10**, **11** on PGE2 production. Dexamethasone was used as a positive control. HepG-2 cells were incubated with 5 μg/mL LPS for 18 h with or without test samples and amounts of PGE2 in the medium was determined using PGE2-specific ELISA assays. (**p* < 0.05; ***p* < 0.01; ****p* < 0.001. **significant as compared to LPS group, n = 5).

**
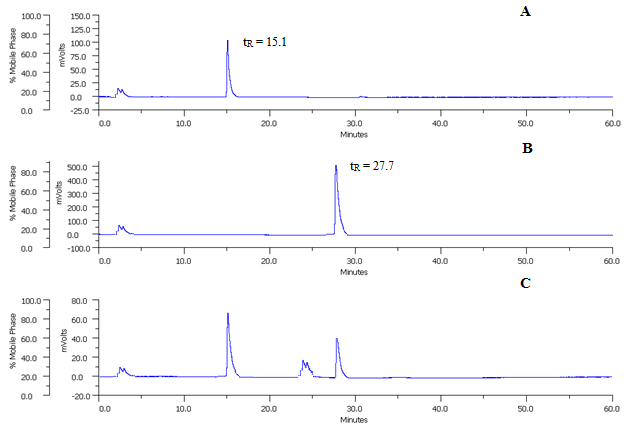
**

**Figure S11.** HPLC chromatograms for sugar analysis

**A:** Standard ᴅ-glucose derivative

**B:** Standard ʟ-rhamnose derivative

**C:** Sugar derivative of compound **11** after acid hydrolysis

**Table S1.** The NMR spectra data for compound **11**

| **Pos.** | ***δ*C*a,b*** | ***δ*H*a,c* (mult., *J* in Hz)** | **Pos.** | ***δ*C*a,b*** | ***δ*H*a,c* (mult., *J* in Hz)** |
| --- | --- | --- | --- | --- | --- |
| 1 | 39.8 | 1.63 (m) | 3-Glc |  |  |
| 2 | 26.9 | 2.00 (m)  1.70 (m) | 1ʹ | 106.6 | 4.33 (d, 7.5) |
| 3 | 90.7 | 3.18 (dd, 4.0, 11.5) | 2ʹ | 76.2 | 3.34 (m) |
| 4 | 40.2 | - | 3ʹ | 83.5 | 3.50 (m) |
| 5 | 57.0 | 0.78 (m, overlap) | 4ʹ | 71.0 | 3.34 (m) |
| 6 | 19.3 | 1.53 (m)  1.41 (m) | 5ʹ | 78.3 | 3.40 (m) |
| 7 | 34.0 | 1.52 (m)  1.37 (m) | 6ʹ | 62.3 | 3.80 (d, 11.5)  3.68 (m) |
| 8 | 40.7 | - | Terminal Rha |  |  |
| 9 | 49.0 | 1.59 (m) | 1″ | 102.4 | 5.18 (s) |
| 10 | 37.9 | - | 2″ | 72.4 | 3.92 (brs) |
| 11 | 24.1 | 2.05 (m)  1.78 (m) | 3″ | 72.3 | 3.72 (m) |
| 12 | 124.4 | 5.31 (brs) | 4″ | 74.2 | 3.37 (m) |
| 13 | 144.4 | - | 5″ | 69.8 | 4.09 (m) |
| 14 | 42.8 | - | 6″ | 17.9 | 1.23 (d, 6.0) |
| 15 | 28.9 | 1.80 (m) | 28-Glc |  |  |
| 16 | 24.5 | 1.91 (m) | 1‴ | 95.7 | 5.34 (d, 8.5) |
| 17 | 47.4 | - | 2‴ | 73.9 | 3.28 (m) |
| 18 | 43.9 | 2.70 (dd, 2.5, 13.5) | 3‴ | 77.3 | 3.57 (m) |
| 19 | 43.3 | 1.97 (m)  1.70 (m) | 4‴ | 72.5 | 3.50 (m) |
| 20 | 44.9 | - | 5‴ | 78.7 | 3.32 (m) |
| 21 | 31.3 | 2.00 (m)  1.39 (m) | 6‴ | 62.3 | 3.80 (d, 11.5)  3.68 (m) |
| 22 | 34.4 | 1.74 (m) |  |  |  |
| 23 | 28.5 | 1.04 (s) |  |  |  |
| 24 | 17.7 | 0.78 (s) |  |  |  |
| 25 | 16.0 | 0.94 (s) |  |  |  |
| 26 | 17.0 | 0.83 (s) |  |  |  |
| 27 | 26.2 | 1.16 (s) |  |  |  |
| 28 | 177.5 | - |  |  |  |
| 29 | 28.6 | 1.14 (s) |  |  |  |
| 30 | 178.7 | - |  |  |  |
| 30-CH3 | 52.3 | 3.69 (s) |  |  |  |

Note: arecorded in CD3OD, b125 MHz, c500 MHz.

**References**

Mosmann T. 1983. Rapid colorimetric assay for cellular growth and survival: application to proliferation and cytotoxicity assays. J Immunol Methods. 65:55-63.

Tanaka T, Nakashima T, Ueda T, Tomii K, Kouno I. 2007. Facile discrimination of aldose anantiomers by reversed-phase HPLC. Chem Pharm Bull. 55:899-901.

Zang M, Zuccollo A, Hou X, Nagata D, Walsh K, Herscovitz H, Brecher P, Ruderman N, Cohen R. 2004. AMP-activated protein kinase is required for the lipid-lowering effect of metformin in insulin-resistant human HepG2 cells. J Biol Chem. 279:47898-47905.
